# Supplementary material for: Genome-wide identification of XTH genes in Liriodendron chinense and functional characterization of LcXTH21
Source: Front Plant Sci. 2022 Oct 27;13:1014339. doi: 10.3389/fpls.2022.1014339 (PMC9647132; doi:10.3389/fpls.2022.1014339)
Supplement: File S1 — The protein sequences used in phylogenetic tree constructing, and open reading frame sequence of LcXTH21. [file Table_6.xls]

Gene_id	biological_process	biological_process_description	cellular_component	cellular_component_description	molecular_function	molecular_function_description	Gene Name
LcXTH06	GO:0005975//GO:0006073//GO:0055114	carbohydrate metabolic process//cellular glucan metabolic process//oxidation-reduction process	GO:0048046//GO:0005618	apoplast//cell wall	GO:0016762//GO:0004553//GO:0016491	xyloglucan:xyloglucosyl transferase activity//hydrolase activity, hydrolyzing O-glycosyl compounds//oxidoreductase activity	--
LcXTH09	GO:0006073//GO:0005975	cellular glucan metabolic process//carbohydrate metabolic process	GO:0048046//GO:0005618	apoplast//cell wall	GO:0004553//GO:0016762	hydrolase activity, hydrolyzing O-glycosyl compounds//xyloglucan:xyloglucosyl transferase activity	--
LcXTH10	GO:0006073//GO:0005975	cellular glucan metabolic process//carbohydrate metabolic process	GO:0048046//GO:0005618	apoplast//cell wall	GO:0016762//GO:0004553	xyloglucan:xyloglucosyl transferase activity//hydrolase activity, hydrolyzing O-glycosyl compounds	--
LcXTH11	GO:0006073//GO:0005975	cellular glucan metabolic process//carbohydrate metabolic process	GO:0005618//GO:0048046	cell wall//apoplast	GO:0004553//GO:0016762	hydrolase activity, hydrolyzing O-glycosyl compounds//xyloglucan:xyloglucosyl transferase activity	--
LcXTH03	GO:0006073//GO:0005975	cellular glucan metabolic process//carbohydrate metabolic process	GO:0048046//GO:0005618	apoplast//cell wall	GO:0004553//GO:0016762	hydrolase activity, hydrolyzing O-glycosyl compounds//xyloglucan:xyloglucosyl transferase activity	--
LcXTH13	GO:0006073//GO:0005975//GO:0009405	cellular glucan metabolic process//carbohydrate metabolic process//pathogenesis	GO:0005576//GO:0005618//GO:0048046	extracellular region//cell wall//apoplast	GO:0016762//GO:0004553	xyloglucan:xyloglucosyl transferase activity//hydrolase activity, hydrolyzing O-glycosyl compounds	--
LcXTH14	GO:0006073//GO:0005975	cellular glucan metabolic process//carbohydrate metabolic process	GO:0005618//GO:0048046	cell wall//apoplast	GO:0016762//GO:0004553	xyloglucan:xyloglucosyl transferase activity//hydrolase activity, hydrolyzing O-glycosyl compounds	--
LcXTH15	GO:0015031//GO:0006073//GO:0006383//GO:0071436//GO:0031412//GO:0005975	protein transport//cellular glucan metabolic process//transcription from RNA polymerase III promoter//sodium ion export//gas vesicle organization//carbohydrate metabolic process	GO:0031411//GO:0048046//GO:0005618//GO:0005666//GO:0016021//GO:0005886//GO:0016020	gas vesicle//apoplast//cell wall//DNA-directed RNA polymerase III complex//integral component of membrane//plasma membrane//membrane	GO:0008565//GO:0016762//GO:0004553//GO:0004252//GO:0003899//GO:0008948//GO:0003677//GO:0015081	protein transporter activity//xyloglucan:xyloglucosyl transferase activity//hydrolase activity, hydrolyzing O-glycosyl compounds//serine-type endopeptidase activity//DNA-directed 5'-3' RNA polymerase activity//oxaloacetate decarboxylase activity//DNA binding//sodium ion transmembrane transporter activity	--
LcXTH16	GO:0006073//GO:0005975//GO:0009405	cellular glucan metabolic process//carbohydrate metabolic process//pathogenesis	GO:0005618//GO:0048046//GO:0005576	cell wall//apoplast//extracellular region	GO:0016762//GO:0019871//GO:0004553	xyloglucan:xyloglucosyl transferase activity//sodium channel inhibitor activity//hydrolase activity, hydrolyzing O-glycosyl compounds	--
LcXTH17	GO:0006073//GO:0005975	cellular glucan metabolic process//carbohydrate metabolic process	GO:0048046//GO:0005618	apoplast//cell wall	GO:0016762//GO:0004553	xyloglucan:xyloglucosyl transferase activity//hydrolase activity, hydrolyzing O-glycosyl compounds	--
LcXTH18	GO:0006073//GO:0005975	cellular glucan metabolic process//carbohydrate metabolic process	GO:0048046//GO:0005618	apoplast//cell wall	GO:0016762//GO:0004553	xyloglucan:xyloglucosyl transferase activity//hydrolase activity, hydrolyzing O-glycosyl compounds	--
LcXTH19	GO:0006073//GO:0005975	cellular glucan metabolic process//carbohydrate metabolic process	GO:0048046//GO:0005618	apoplast//cell wall	GO:0004553//GO:0016762	hydrolase activity, hydrolyzing O-glycosyl compounds//xyloglucan:xyloglucosyl transferase activity	--
LcXTH20	GO:0006073//GO:0005975	cellular glucan metabolic process//carbohydrate metabolic process	GO:0005618//GO:0048046	cell wall//apoplast	GO:0016762//GO:0004553	xyloglucan:xyloglucosyl transferase activity//hydrolase activity, hydrolyzing O-glycosyl compounds	--
LcXTH21	GO:0006073//GO:0005975	cellular glucan metabolic process//carbohydrate metabolic process	GO:0048046//GO:0005618	apoplast//cell wall	GO:0004553//GO:0016762	hydrolase activity, hydrolyzing O-glycosyl compounds//xyloglucan:xyloglucosyl transferase activity	--
LcXTH22	GO:0006073//GO:0005975	cellular glucan metabolic process//carbohydrate metabolic process	GO:0005618//GO:0048046	cell wall//apoplast	GO:0004553//GO:0016762	hydrolase activity, hydrolyzing O-glycosyl compounds//xyloglucan:xyloglucosyl transferase activity	--
LcXTH23	GO:0006073//GO:0005975	cellular glucan metabolic process//carbohydrate metabolic process	GO:0048046//GO:0005618	apoplast//cell wall	GO:0016762//GO:0004553	xyloglucan:xyloglucosyl transferase activity//hydrolase activity, hydrolyzing O-glycosyl compounds	--
LcXTH24	GO:0006073//GO:0005975	cellular glucan metabolic process//carbohydrate metabolic process	GO:0048046//GO:0005618	apoplast//cell wall	GO:0004553//GO:0016762	hydrolase activity, hydrolyzing O-glycosyl compounds//xyloglucan:xyloglucosyl transferase activity	--
LcXTH25	GO:0006073//GO:0005975	cellular glucan metabolic process//carbohydrate metabolic process	GO:0048046//GO:0005618	apoplast//cell wall	GO:0016762//GO:0004553	xyloglucan:xyloglucosyl transferase activity//hydrolase activity, hydrolyzing O-glycosyl compounds	--
LcXTH02	GO:0006073//GO:0005975	cellular glucan metabolic process//carbohydrate metabolic process	GO:0005618//GO:0048046	cell wall//apoplast	GO:0004553//GO:0016762	hydrolase activity, hydrolyzing O-glycosyl compounds//xyloglucan:xyloglucosyl transferase activity	--
LcXTH12	GO:0005975//GO:0006073//GO:0035434	carbohydrate metabolic process//cellular glucan metabolic process//copper ion transmembrane transport	GO:0016021//GO:0048046//GO:0005618	integral component of membrane//apoplast//cell wall	GO:0016762//GO:0005375//GO:0008289//GO:0004553	xyloglucan:xyloglucosyl transferase activity//copper ion transmembrane transporter activity//lipid binding//hydrolase activity, hydrolyzing O-glycosyl compounds	--
LcXTH04	GO:0006073//GO:0005975	cellular glucan metabolic process//carbohydrate metabolic process	GO:0048046//GO:0005618	apoplast//cell wall	GO:0004553//GO:0016762	hydrolase activity, hydrolyzing O-glycosyl compounds//xyloglucan:xyloglucosyl transferase activity	--
LcXTH01	GO:0006073//GO:0005975	cellular glucan metabolic process//carbohydrate metabolic process	GO:0048046//GO:0005618	apoplast//cell wall	GO:0016762//GO:0004553	xyloglucan:xyloglucosyl transferase activity//hydrolase activity, hydrolyzing O-glycosyl compounds	--
LcXTH05	GO:0006073//GO:0005975	cellular glucan metabolic process//carbohydrate metabolic process	GO:0005618//GO:0048046	cell wall//apoplast	GO:0004553//GO:0016762	hydrolase activity, hydrolyzing O-glycosyl compounds//xyloglucan:xyloglucosyl transferase activity	--
LcXTH07	GO:0006073//GO:0005975	cellular glucan metabolic process//carbohydrate metabolic process	GO:0048046//GO:0005618	apoplast//cell wall	GO:0016762//GO:0004553	xyloglucan:xyloglucosyl transferase activity//hydrolase activity, hydrolyzing O-glycosyl compounds	--
LcXTH08	GO:0005975//GO:0006073	carbohydrate metabolic process//cellular glucan metabolic process	GO:0048046//GO:0005618	apoplast//cell wall	GO:0004553//GO:0016762	hydrolase activity, hydrolyzing O-glycosyl compounds//xyloglucan:xyloglucosyl transferase activity	--
LcXTH26	GO:0006073//GO:0005975	cellular glucan metabolic process//carbohydrate metabolic process	GO:0048046//GO:0005618	apoplast//cell wall	GO:0004553//GO:0016762	hydrolase activity, hydrolyzing O-glycosyl compounds//xyloglucan:xyloglucosyl transferase activity	--
LcXTH27	GO:0006122//GO:0006073//GO:0005975	mitochondrial electron transport, ubiquinol to cytochrome c//cellular glucan metabolic process//carbohydrate metabolic process	GO:0005750//GO:0005743//GO:0005618//GO:0048046	mitochondrial respiratory chain complex III//mitochondrial inner membrane//cell wall//apoplast	GO:0016762//GO:0004553	xyloglucan:xyloglucosyl transferase activity//hydrolase activity, hydrolyzing O-glycosyl compounds	--
