# Supplementary material for: Genome-wide identification of XTH genes in Liriodendron chinense and functional characterization of LcXTH21
Source: Front Plant Sci. 2022 Oct 27;13:1014339. doi: 10.3389/fpls.2022.1014339 (PMC9647132; doi:10.3389/fpls.2022.1014339)
Supplement: Supplementary Table 3 — The substitution rates (Ka/Ks) and diverging time of LcXTH gene pairs. [file Table_3.xlsx]

## Sheet: Sheet1
Symbol	Gene ID	Peptidelength(aa)		PI	MW(kDa)		Subcellular localization
LcXTH01	Lchi16506		294	5.29		33.31	Cell wall
LcXTH02	Lchi11801		292	7.58		34.2	Cell wall. Cytoplasm.
LcXTH03	Lchi04120		294	8.76		33.41	Cell wall
LcXTH04	Lchi15540		290	5.51		33.09	Cell wall
LcXTH05	Lchi16689		294	8.66		34.25	Cell wall. Cytoplasm.
LcXTH06	Lchi00376		274	8.2		31.8	Cell wall. Cytoplasm.
LcXTH07	Lchi18286		294	8.2		33.75	Cell wall
LcXTH08	Lchi18288		289	6.44		33	Cell wall
LcXTH09	Lchi03291		285	8.56		32.07	Cell wall. Cytoplasm.
LcXTH10	Lchi03292		280	8.95		31.79	Cell wall. Cytoplasm.
LcXTH11	Lchi03293		294	8.45		33.11	Cell wall. Cytoplasm.
LcXTH12	Lchi13800		327	6.86		37.5	Cell wall
LcXTH13	Lchi05102		308	4.85		34.48	Cell wall
LcXTH14	Lchi05103		291	5.12		32.82	Cell wall. Cytoplasm.
LcXTH15	Lchi05104		265	5.44		29.99	Cell wall
LcXTH16	Lchi05107		252	8.16		28.67	Cell wall
LcXTH17	Lchi05108		243	9.65		27.61	Cell wall
LcXTH18	Lchi05109		285	5.76		32.63	Cell wall. Cytoplasm.
LcXTH19	Lchi05112		281	5.39		31.84	Cell wall. Cytoplasm.
LcXTH20	Lchi05113		294	5.44		33.24	Cell wall. Cytoplasm.
LcXTH21	Lchi05114		291	4.91		32.98	Cell wall. Cytoplasm.
LcXTH22	Lchi05115		291	5.67		33.04	Cell wall. Cytoplasm.
LcXTH23	Lchi05116		302	5.01		34.59	Cell wall. Cytoplasm.
LcXTH24	Lchi05117		291	5.96		32.93	Cell wall. Cytoplasm.
LcXTH25	Lchi05118		271	5.11		30.66	Cell wall. Cytoplasm.
LcXTH26	Lchi30260		337	5.26		38.26	Cell wall
LcXTH27	Lchi31846		337	6.13		38.47	Cell wall
