# Supplementary material for: Genome-wide identification of XTH genes in Liriodendron chinense and functional characterization of LcXTH21
Source: Front Plant Sci. 2022 Oct 27;13:1014339. doi: 10.3389/fpls.2022.1014339 (PMC9647132; doi:10.3389/fpls.2022.1014339)
Supplement: Supplementary Table 4 — The protein similarity matrix of LcXTH genes. [file Table_4.xlsx]

## Sheet: Sheet1
		Ka	Ks	Ka_Ks		diverging time
Lchi18288	Lchi13800	0.0862367	0.810423	0.106409		66.4281
Lchi03291	Lchi05103	0.261862	2.29597	0.114053		188.194
Lchi11801	Lchi16689	0.0816339	0.82206	0.099304		67.382
