# Supplementary material for: Genome-wide identification of XTH genes in Liriodendron chinense and functional characterization of LcXTH21
Source: Front Plant Sci. 2022 Oct 27;13:1014339. doi: 10.3389/fpls.2022.1014339 (PMC9647132; doi:10.3389/fpls.2022.1014339)
Supplement: Supplementary Table 5 — The GO annotations of LcXTH genes. [file Table_5.xls]

## Sheet: Sheet1
	LcXTH01	LcXTH02	LcXTH03	LcXTH04	LcXTH05	LcXTH06	LcXTH07	LcXTH08	LcXTH09	LcXTH10	LcXTH11	LcXTH12	LcXTH13	LcXTH14	LcXTH15	LcXTH16	LcXTH17	LcXTH18	LcXTH19	LcXTH20	LcXTH21	LcXTH22	LcXTH23	LcXTH24	LcXTH25	LcXTH26	LcXTH27
LcXTH01	100	66.89	48.45	72.43	64.9	63.28	60.78	64.33	64.26	61.67	61.59	57.74	55.21	60.71	57.43	59.06	50.67	60.83	62.08	62.17	63.04	62.62	59.25	62.38	60.33	44.69	45.89
LcXTH02	66.89	100	49.22	60.45	91.84	85.27	60.8	66.78	63.33	62.75	59.22	60.6	55.05	65.66	59.41	60.07	50.5	63.61	64.16	64.53	63.11	64.26	59.81	61.86	60.74	49.28	46.92
LcXTH03	48.45	49.22	100	46.91	49.54	49.03	49.22	49.21	48.74	48.72	49.54	44.57	42.51	49.53	45.98	45.75	44.01	50.48	52.1	50.63	50	49.84	48.62	47.63	48.7	44.17	47.08
LcXTH04	72.43	60.45	46.91	100	61.94	61.06	61.64	63.64	66	60.13	57.93	56.25	56.51	63.46	55.78	58.31	49.83	61.46	62.08	64.24	64.77	61.59	57.55	63.3	58.86	47.88	45.76
LcXTH05	64.9	91.84	49.54	61.94	100	83.33	61.39	66.11	63.04	62.67	61.89	60.66	56.7	66.56	59.87	59.66	52.3	64.12	64.41	65.44	65.56	66.22	59.69	65.55	61.67	47.06	46.13
LcXTH06	63.28	85.27	49.03	61.06	83.33	100	57.52	63.3	59.8	60.68	56.49	56.46	50.46	61.69	57.73	64	53.5	63.36	64.41	61.56	62.71	62.16	59.22	58.88	64.13	49.57	47.23
LcXTH07	60.78	60.8	49.22	61.64	61.39	57.52	100	60.54	57.95	59.18	58.31	55.69	53.97	62.58	56.86	55.41	49.67	60.19	60.27	60.86	62.42	63.09	57.37	62.08	56.9	48.26	47.52
LcXTH08	64.33	66.78	49.21	63.64	66.11	63.3	60.54	100	65.99	65.42	66.11	79.46	60.77	68.26	66.78	78.2	52.88	64.03	66.55	67.91	68.26	67.79	62.34	67.12	62.96	47.01	47.29
LcXTH09	64.26	63.33	48.74	66	63.04	59.8	57.95	65.99	100	73.29	72.05	58.46	66.24	78.01	69.9	58.28	59.25	74.66	74.5	75.84	77.05	74.5	71.57	76.03	73.88	43.54	43.58
LcXTH10	60.46	62.75	48.72	60.13	62.67	60.68	59.18	65.42	73.29	100	79.25	57.83	71.02	83.56	61.74	59.09	69.37	82.87	85.51	83.05	83.22	83.56	78.62	81.51	84.45	42.3	42.94
LcXTH11	61.59	59.22	49.54	57.93	61.89	56.49	58.31	66.11	72.05	79.25	100	58.14	68.55	77.67	62.09	57.48	64.88	76.33	76.09	77.93	78.79	77.59	70.75	77.44	73.4	45.56	46
LcXTH12	57.74	60.6	44.57	56.25	60.66	56.46	55.69	79.46	58.46	57.83	58.14	100	53.13	59.88	57.65	66.16	47.16	57.14	57.53	59.16	59.34	59.41	56.53	60.42	56.34	42.49	42.82
LcXTH13	55.21	55.05	42.51	56.51	56.7	50.46	53.97	60.77	66.24	71.02	68.55	53.13	100	83.39	58.86	55.66	62.26	71.47	79.87	82.28	84.66	82.11	74.55	84.39	70.7	40.61	38.85
LcXTH14	60.71	65.66	49.53	63.46	66.56	61.69	62.58	68.26	78.01	83.56	77.67	59.88	83.39	100	62.63	58.64	67.24	82.49	94.16	95.92	96.56	95.19	87.18	95.19	83.22	45.51	44.82
LcXTH15	57.43	59.41	45.98	55.78	59.87	57.73	56.86	66.78	69.9	61.74	62.09	57.65	58.86	62.63	100	77.82	58.42	64.86	64.36	62.67	64.6	63.21	59.37	63.46	62.76	40.74	42.17
LcXTH16	59.06	60.07	45.75	58.31	59.66	64	55.41	78.2	58.28	59.09	57.48	66.16	55.66	58.64	77.82	100	60.54	60.55	62.06	58.05	58.31	58.25	57	58.25	61.01	42.98	42.82
LcXTH17	50.67	50.5	44.01	49.83	52.3	53.5	49.67	52.88	59.25	69.37	64.88	47.16	62.26	67.24	58.42	60.54	100	68.18	69.61	65.2	67.24	66.21	64.47	66.21	69.85	37.24	37.36
LcXTH18	60.83	63.61	50.48	61.46	64.12	63.36	60.19	64.03	74.66	82.87	76.33	57.14	71.47	82.49	64.86	60.55	68.18	100	86.06	81.67	82.15	82.03	79.74	80.34	83.22	48.69	46.97
LcXTH19	62.08	64.16	52.1	62.08	64.41	64.41	60.27	66.55	74.5	85.51	76.09	57.53	79.87	94.16	64.36	62.06	69.61	86.06	100	92.86	93.81	92.1	89.4	91.07	86.52	45.11	47.67
LcXTH20	62.17	64.53	50.63	64.24	65.44	61.56	60.86	67.91	75.84	83.05	77.93	59.16	82.28	95.92	62.67	58.05	65.2	81.67	92.86	100	95.24	93.54	84.76	93.54	82.71	44.97	45.66
LcXTH21	63.04	63.11	50	64.77	65.56	62.71	62.42	68.26	77.05	83.22	78.79	59.34	84.66	96.56	64.6	58.31	67.24	82.15	93.81	95.24	100	94.85	86.86	96.22	83.22	46.92	45.81
LcXTH22	62.62	64.26	49.84	61.59	66.22	62.16	63.09	67.79	75.17	83.56	77.59	59.41	82.11	95.19	63.21	58.25	66.21	82.03	92.1	93.54	94.85	100	84.94	93.81	81.85	45.07	47.84
LcXTH23	59.25	59.81	48.62	57.55	59.69	59.22	57.37	62.34	71.57	78.62	70.75	56.53	74.55	87.18	59.37	57	64.47	79.74	89.4	84.76	86.86	84.94	100	85.58	80.53	44.6	44.93
LcXTH24	62.38	61.86	47.63	63.3	65.55	58.88	62.08	67.12	76.03	81.51	77.44	60.42	84.39	95.19	63.46	58.25	66.21	80.34	91.07	93.54	96.22	93.81	85.58	100	81.16	45.66	44.97
LcXTH25	60.33	60.74	48.7	58.86	61.67	64.13	56.95	62.96	73.88	84.45	73.4	56.34	70.7	83.22	62.76	61.01	69.85	83.22	86.52	82.71	83.22	81.85	80.53	81.16	100	44.48	44.67
LcXTH26	44.69	49.28	44.17	47.88	47.06	49.57	48.26	47.01	43.54	42.3	45.56	42.49	40.61	45.51	40.74	42.98	37.24	48.69	45.11	44.97	46.92	45.89	44.6	45.66	44.48	100	55.86
LcXTH27	45.89	46.92	47.08	45.76	46.13	47.23	47.52	47.29	43.58	42.94	46	42.82	38.85	44.82	42.17	42.82	37.36	46.97	47.67	45.66	45.81	47.84	44.93	44.97	44.67	55.86	100
